# Supplementary material for: Antioxidant and UV photoprotective activity of lichenized fungi from Paramo de Sumapaz (Colombia)
Source: Research Square preprint supplement (doi:10.21203/rs.3.rs-7005757/v1), 2025-07-24
Supplement: Supplementary file 1 [file 105162248686ab55edaa7590.docx]

Table S1. Normality and homoscedasticity tests for DPPH scavenging activity (EC50) of some lichenised fungi extracts from Paramo de Sumapaz and BHT

| Normality | | | Homoscedasticity | | |
| --- | --- | --- | --- | --- | --- |
| Shapiro-Wilk | W | p-value | Bartlett | K | p-value |
| 0.9022 | 0.1691 | 15.767 | 0.0075 |
| Due to the homoscedasticity issue a Welch – One way ANOVA with transformed data was applied to determine differences between groups. | | | | | |

Table S2. Normality test for Ferric ion reducing power (FRAP) of some lichenised fungi extracts from Paramo de Sumapaz and BHT.

| Sample | Parameter | Concentration in µg mL-1 | | | | |
| --- | --- | --- | --- | --- | --- | --- |
| 10 | 50 | 100 | 200 | 500 |
| BHT | W | 0.8088 | 0.9999 | 0.9328 | 0.9774 | 0.9725 |
| p-value | 0.1357 | 0.9784 | 0.4992 | 0.7117 | 0.6821 |
| *Lobariella* | W | 0.7741 | 0.9940 | 0.9313 | 0.9962 | 0.9865 |
| p-value | 0.0542 | 0.8522 | 0.4937 | 0.8814 | 0.7775 |
| *Thamnolia* | W | 0.8641 | 0.8686 | 0.8058 | 0.9699 | 0.9036 |
| p-value | 0.3150 | 0.2914 | 0.1285 | 0.6673 | 0.3970 |
| *Everniastrum* | W | 0.8403 | 0.9971 | 0.9974 | 0.9727 | 0.9992 |
| p-value | 0.2148 | 0.8972 | 0.9026 | 0.6832 | 0.9469 |
| *Peltigera* old | W | 0.9041 | 0.9732 | 0.8773 | 0.7966 | 0.7500 |
| p-value | 0.3987 | 0.6860 | 0.3166 | 0.1066 | 0.0500 |
| *Peltigera* young | W | 0.8394 | 0.9494 | 0.7840 | 0,8041 | 0.8573 |
| p-value | 0.2125 | 0.5665 | 0.0769 | 0,1244 | 0.2602 |

Table S3. Homoscedasticity test for Ferric ion reducing power (FRAP) of some lichenised fungi extracts from Paramo de Sumapaz and BHT.

| Parameter | Levene test for each concentration in µg mL-1 | | | | |
| --- | --- | --- | --- | --- | --- |
| 10 | 50 | 100 | 200 | 500 |
| F-value | 0.2886 | 1.3779 | 1.0906 | 0.3492 | 1.4442 |
| Pr > F | 0.9103 | 0.2995 | 0.4140 | 0.8731 | 0.2780 |

Table S4. Normality and Homoscedasticity tests for photoprotection parameters at 100 µg mL-1 of some lichenised fungi extracts from Paramo de Sumapaz and four common commercial sunscreens.

|  | | | λcrit | UVA/UVB  ratio | UVA-I  ratio | FPS* |
| --- | --- | --- | --- | --- | --- | --- |
| Shapiro-Wilk | BMT | W | 0.8685 | 0.9468 | 0.9549 | 1.0000 |
| p-value | 0.2911 | 0.5553 | 0.5913 | 0.9999 |
| OMC | W | 0.8762 | 0.9953 | 0.8467 | 1.0000 |
| p-value | 0.3133 | 0.8696 | 0.2315 | 0.9999 |
| AVO | W | 0.7799 | 0.9346 | 0.9788 | 0.9906 |
| p-value | 0.0674 | 0.5060 | 0.7209 | 0.8148 |
| BP3 | W | 0.9067 | 0.9891 | 0.9932 | 1.0000 |
| p-value | 0.4072 | 0.8002 | 0.8428 | 0.9997 |
| *Lobariella* | W | 0.9917 | 0.9952 | 0.9934 | 0.9219 |
| p-value | 0.8264 | 0.8680 | 0.8446 | 0.4592 |
| *Thamnolia* | W | 0.8685 | 0.9468 | 0.9549 | 0.9760 |
| p-value | 0.2911 | 0.5553 | 0.5913 | 0.7028 |
| *Everniastrum* | W | 0.9818 | 0.9915 | 0.9901 | 0.9869 |
| p-value | 0.7413 | 0.8233 | 0.8100 | 0.7816 |
| *Peltigera* old | W | 0.9975 | 0.8877 | 0.9187 | 0.8783 |
| p-value | 0.9042 | 0.3474 | 0.4478 | 0.3193 |
| *Peltigera* young | W | 0.7777 | 0.9274 | 0.9228 | 0.7734 |
| p-value | 0.0624 | 0.5758 | 0.4624 | 0.0614 |
| Homoscedasticity - Levene | Barlett | K | 13.5680 | - | - | - |
| p-value | 0.0937 | - | - | - |
| Levene | F-value | 1.1112 | 2.2275 | 1.2228 | 2.1238 |
| Pr > F | 0.4005 | 0.0754 | 0.3410 | 0.0879 |
| *For SPF a Box Cox transformation with log10(SPF) was required before ANOVA. The reported parameters are from transformed variable.  p-values > 0.05 do not reject null hypothesis. | | | | | | |
